# Supplementary material for: Highly luminescent and ultrastable cesium lead halide perovskite nanocrystal glass for plant-growth lighting engineering
Source: Royal Society of Chemistry journal article supplement (doi:10.1039/c9tc04799a), 2019-01-01
Supplement: c9tc04799a1.pdf [file c9tc04799a1.pdf]

## Supplementary Material

### Highly Luminescent and Ultrastability Cesium Lead Halide Perovskite Nanocrystals glass for Plant-growth Lighting Engineering

Jianming Liu, Linli Shen, Ya Chen, Yi Zhao, Yaqian Zhang,  
Mengfeifei Jin, Haisheng Yang, Yujie Zhang, Weidong Xiang(\*),  
Xiaojuan Liang(\*)

College of Chemistry and Materials Engineering, Wenzhou University, Wenzhou 325  
035, China

E-mail: Xiangweidong001@126.com, lxj6126@126.com

| Sample                                  | B <sub>2</sub> O <sub>3</sub> | ZnO   | SiO <sub>2</sub> | Na <sub>2</sub> CO <sub>3</sub> | Cs <sub>2</sub> CO <sub>3</sub> | PbO  | NaCl | NaBr | NaI  |
|-----------------------------------------|-------------------------------|-------|------------------|---------------------------------|---------------------------------|------|------|------|------|
| CsPbCl <sub>3</sub>                     | 11.50                         | 31.20 | 34.00            | 6.30                            | 6.50                            | 4.00 | 6.50 | 0    | 0    |
| CsPbCl <sub>2</sub> Br <sub>1</sub>     | 11.50                         | 31.20 | 34.00            | 6.30                            | 6.50                            | 4.00 | 4.33 | 2.17 | 0    |
| CsPbCl <sub>1.5</sub> Br <sub>1.5</sub> | 11.50                         | 31.20 | 34.00            | 6.30                            | 6.50                            | 4.00 | 3.25 | 3.25 | 0    |
| CsPbCl <sub>1</sub> Br <sub>2</sub>     | 11.50                         | 31.20 | 34.00            | 6.30                            | 6.50                            | 4.00 | 2.17 | 4.33 | 0    |
| CsPbBr <sub>3</sub>                     | 11.50                         | 31.20 | 34.00            | 6.30                            | 6.50                            | 4.00 | 0    | 6.50 | 0    |
| CsPbBr <sub>2</sub> I <sub>1</sub>      | 11.50                         | 31.20 | 34.00            | 6.30                            | 6.50                            | 4.00 | 0    | 4.33 | 2.17 |
| CsPbBr <sub>1.5</sub> I <sub>1.5</sub>  | 11.50                         | 31.20 | 34.00            | 6.30                            | 6.50                            | 4.00 | 0    | 3.25 | 3.25 |
| CsPbBr <sub>1</sub> I <sub>2</sub>      | 11.50                         | 31.20 | 34.00            | 6.30                            | 6.50                            | 4.00 | 0    | 2.17 | 4.33 |
| CsPbI <sub>3</sub>                      | 11.50                         | 31.20 | 34.00            | 6.30                            | 6.50                            | 4.00 | 0    | 0    | 6.50 |

Table S1 Specific content of all CsPbX<sub>3</sub>(Cl, Br and I) NCs glass samples.

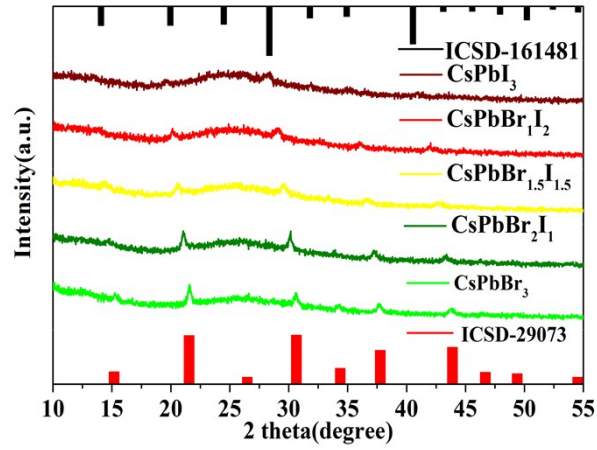

Fig. S1 XRD patterns of the  $\text{CsPbBr}_x\text{I}_{3-x}$  ( $x=3, 2, 1.5, 1$  and  $0$ ) (ICSD-29073 and ICSD-161481).

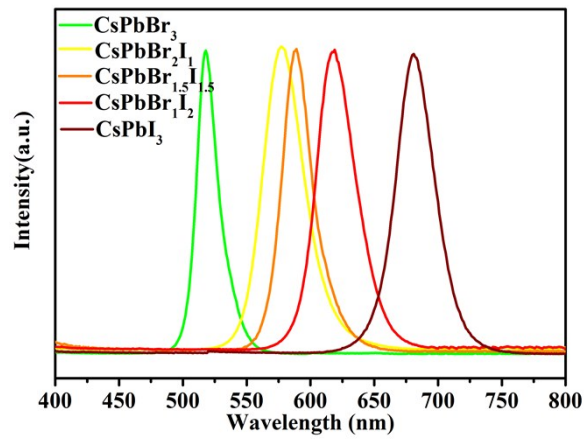

Fig. S2 PL emission spectra of  $\text{CsPbBr}_x\text{I}_{3-x}$  ( $x=3, 2, 1.5, 1$  and  $0$ ) NCs glass.

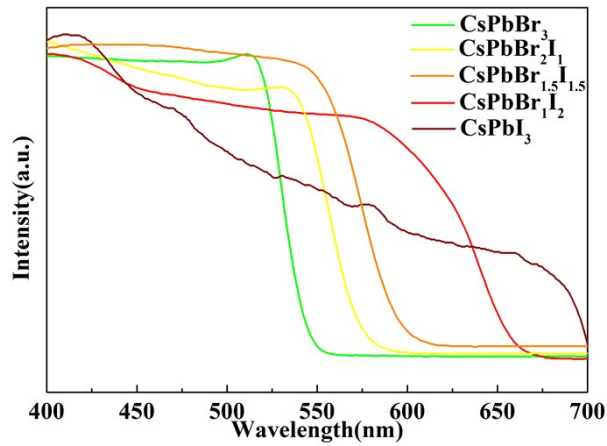

Fig.S3 The absorption spectra  $\text{CsPbBr}_x\text{I}_{3-x}$  ( $x=3, 2, 1.5, 1$  and  $0$ ) NCs glass.

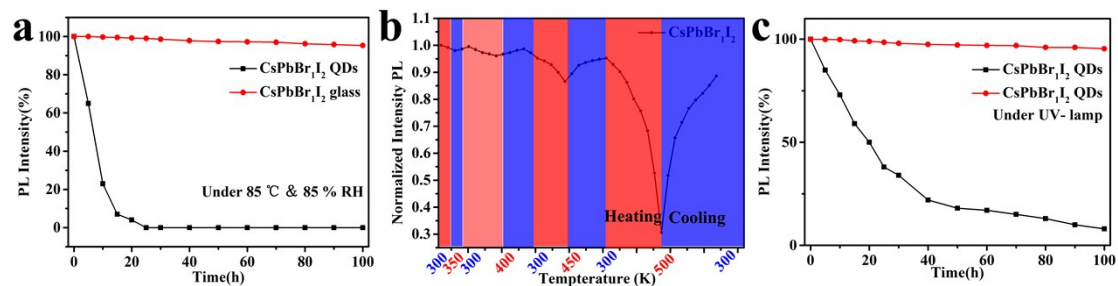

Fig. S4 (a) CsPbBr<sub>2</sub>I<sub>1</sub> NCs glass exposure to the environment with 85 % RH at 85 °C, (b) Thermal cycling measurements of CsPbBr<sub>2</sub>I<sub>1</sub> NCs glass. High set point temperatures are highlighted in red for clarity. (c) CsPbBr<sub>2</sub>I<sub>1</sub> NCs glass under the UV-lamp with different exposure times and the corresponding PL intensity.

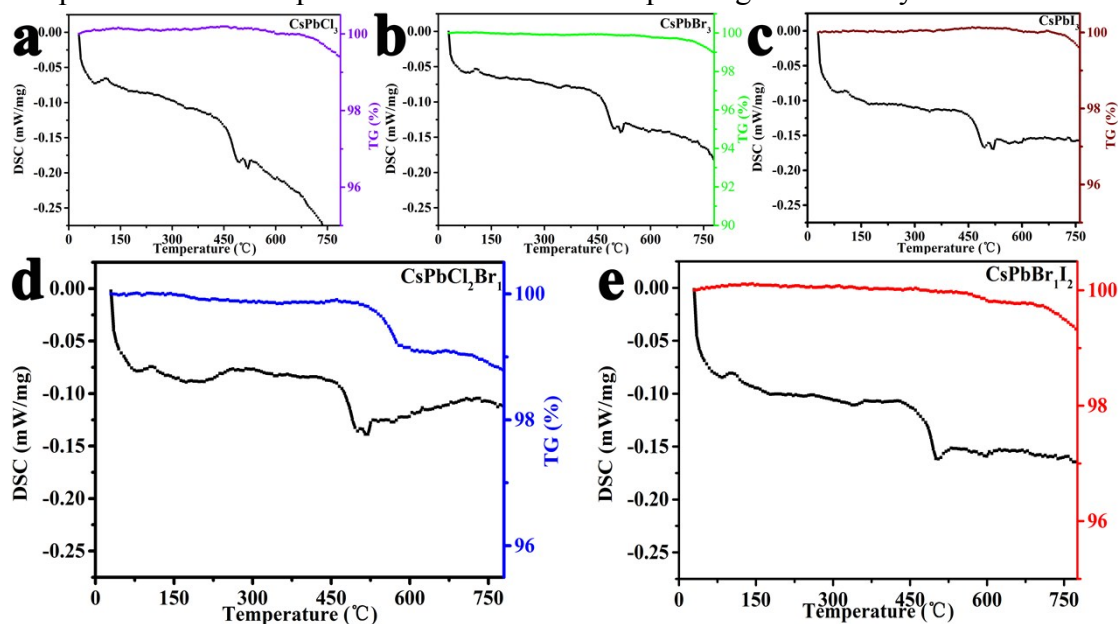

Fig. S5 Tg-DSC curves of CsPbX<sub>3</sub> QDs glass.

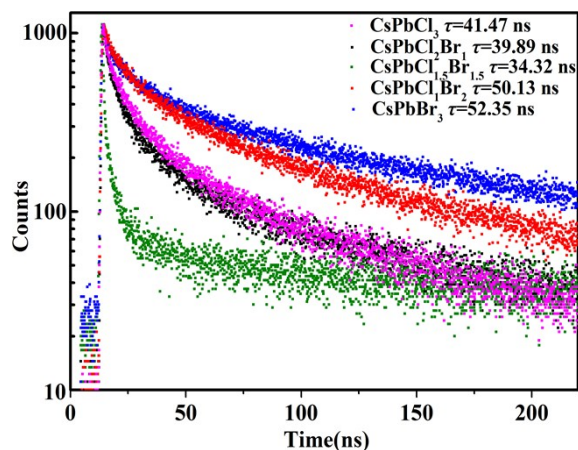

Fig. S6 Time-resolved PL decay profiles of CsPbX<sub>3</sub> (X=Cl and Br) NCs glasses.
